# Supplementary material for: A one-pot sequence for the efficient synthesis of highly functionalized macrocarbocycles or bridged 2,8-dioxabicyclo[3.2.1]octanes from 1-nitrobicyclic compounds
Source: Royal Society of Chemistry journal article supplement (doi:10.1039/c2ob25274k), 2012-01-01

*Supporting Information*

**A one-pot sequence for the efficient synthesis of highly functionalized macrocarbocycles or bridged 2,8-dioxabicyclo[3.2.1]octanes from 1-nitrobicyclic compounds**

Giorgio Giorgi, Pilar López-Alvarado and J. Carlos Menéndez<sup>a\*</sup>

*Departamento de Química Orgánica y Farmacéutica, Facultad de Farmacia, Universidad Complutense, 28040 Madrid, Spain. Fax: 34-91-3941822; Tel: 34-91-3941840; E-mail: josecm@farm.ucm.es.*

SPECTRA

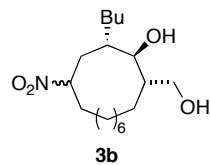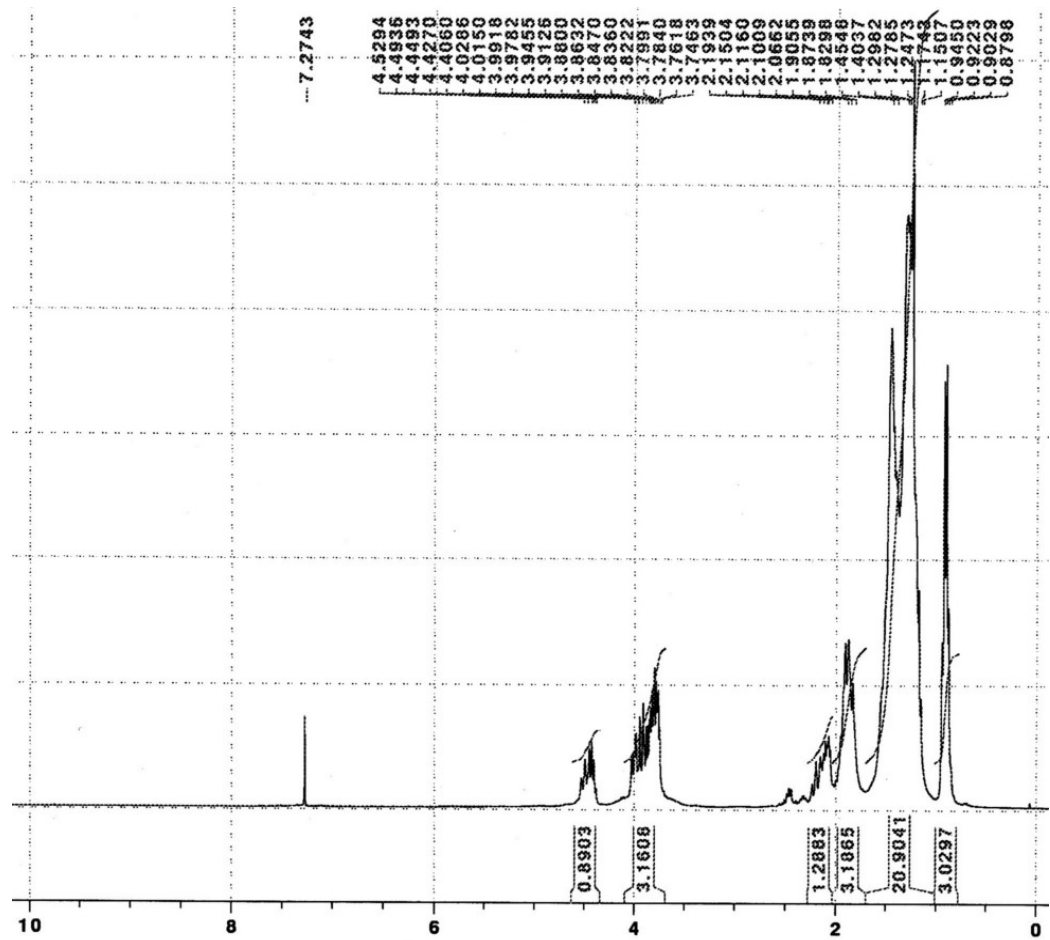

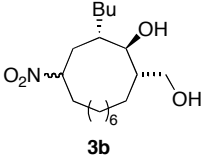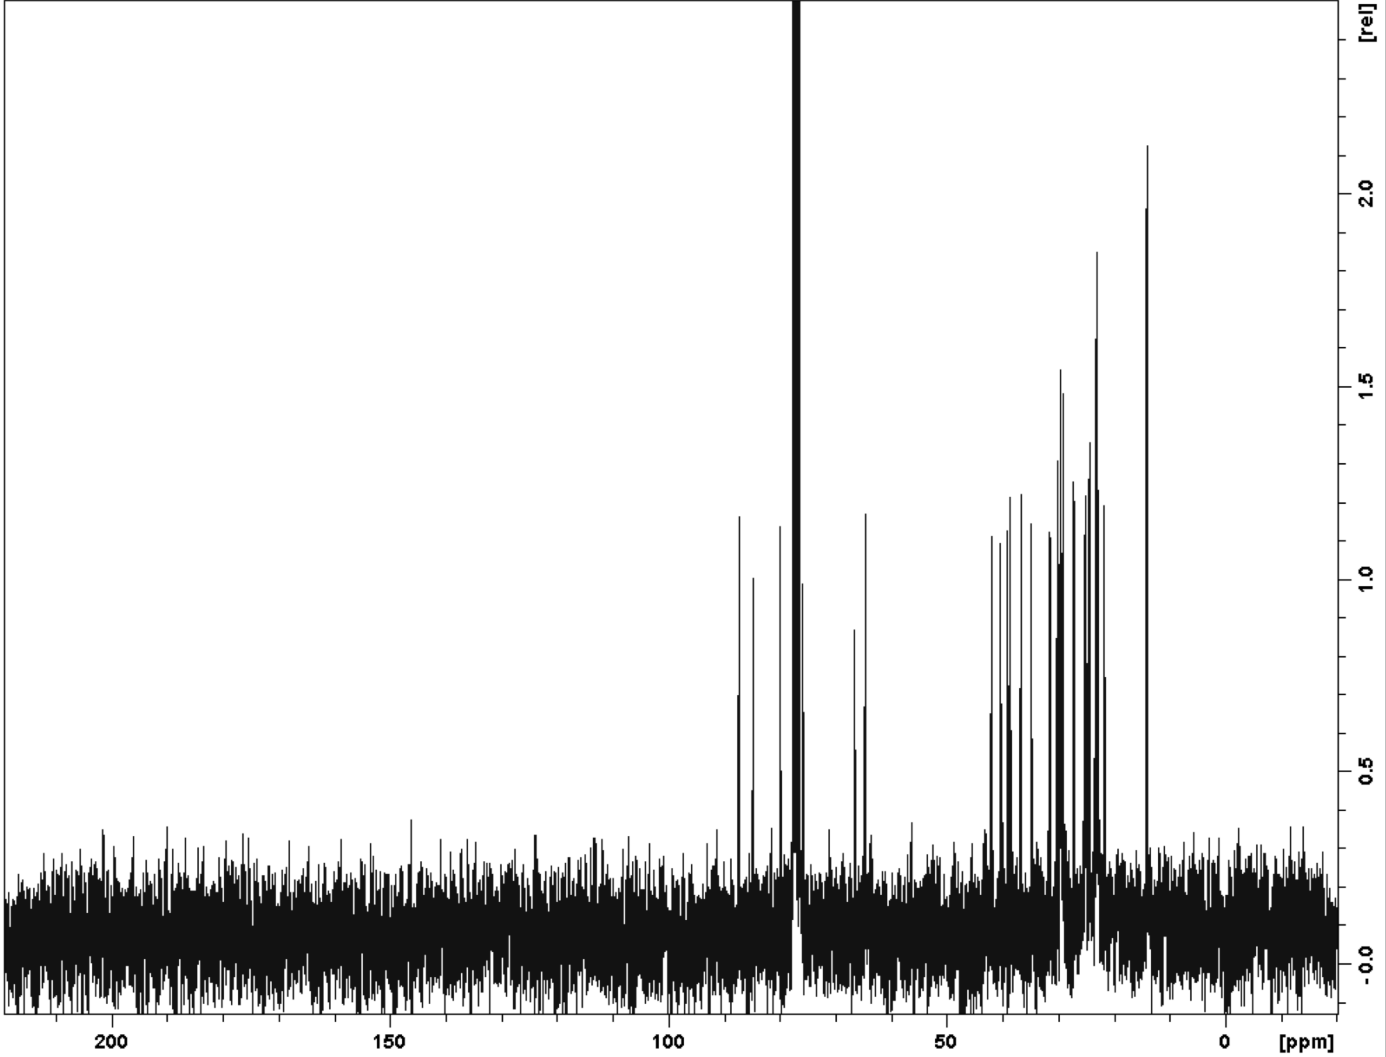

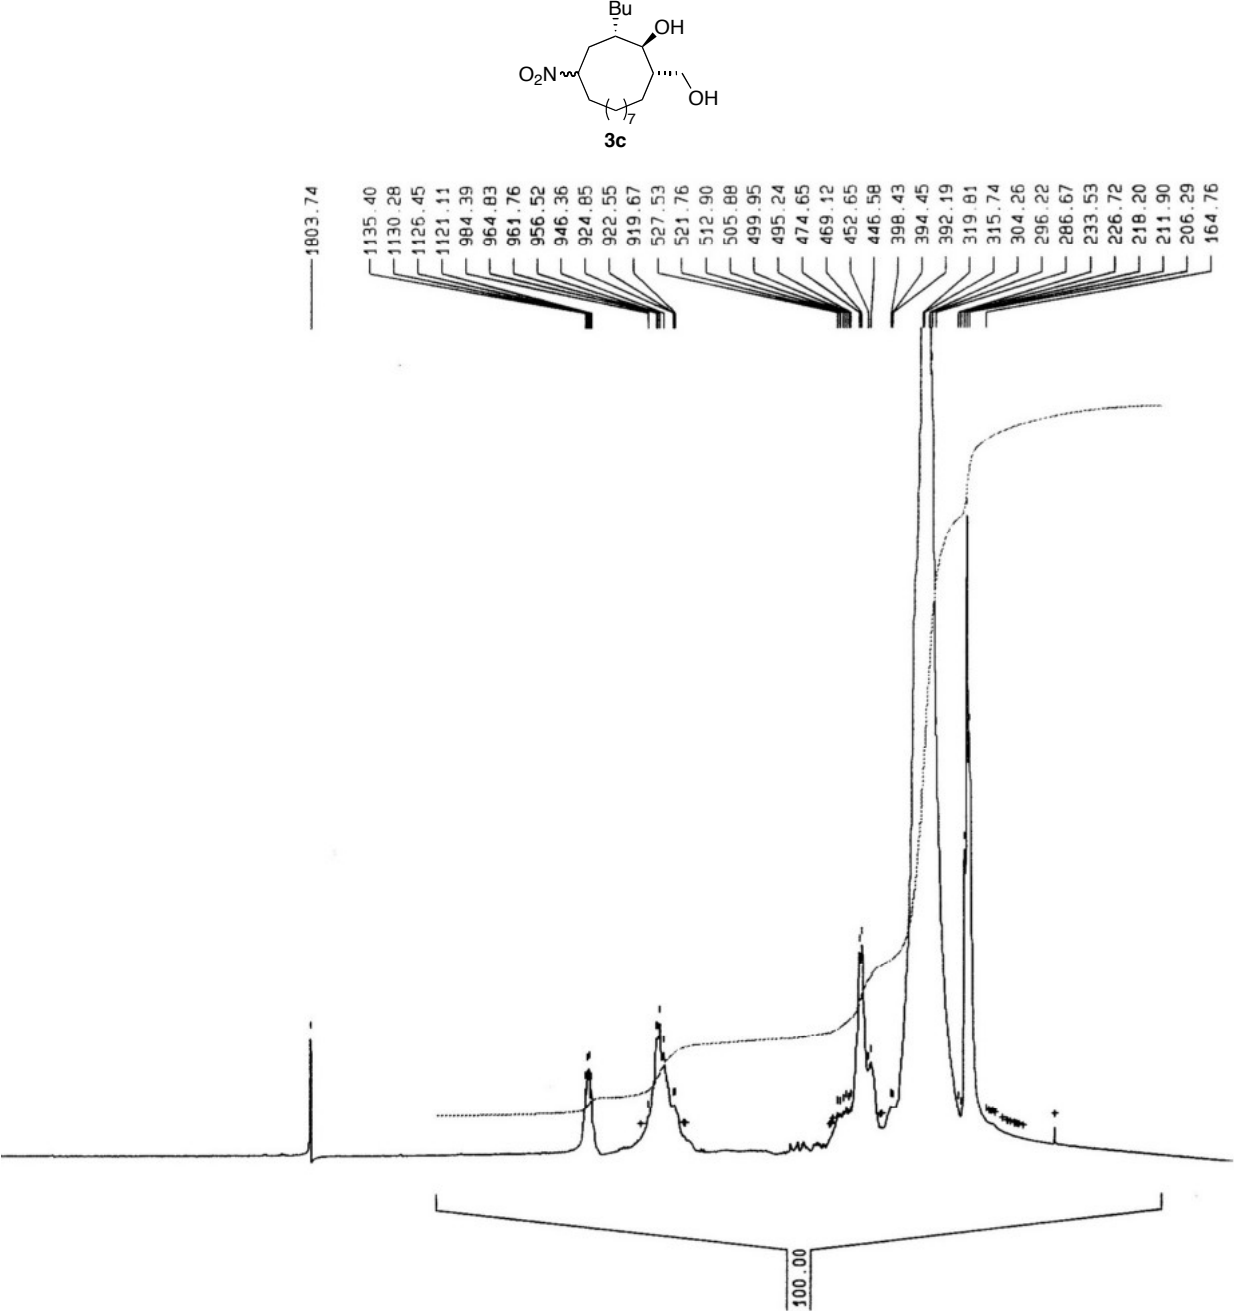

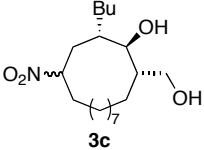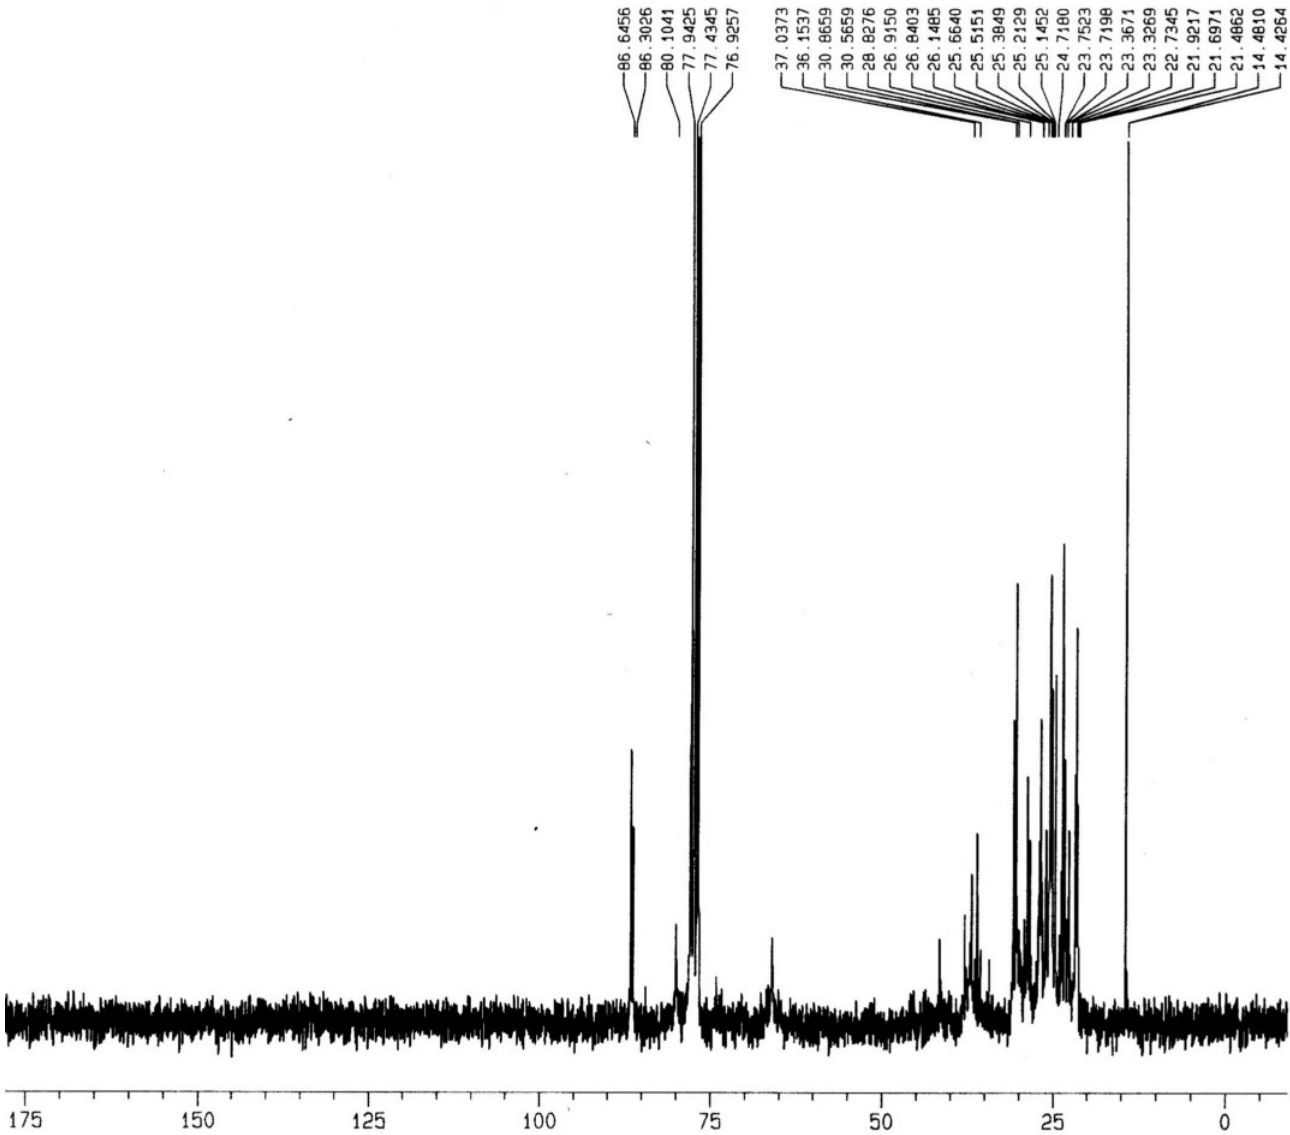

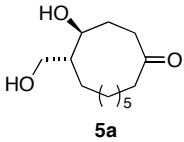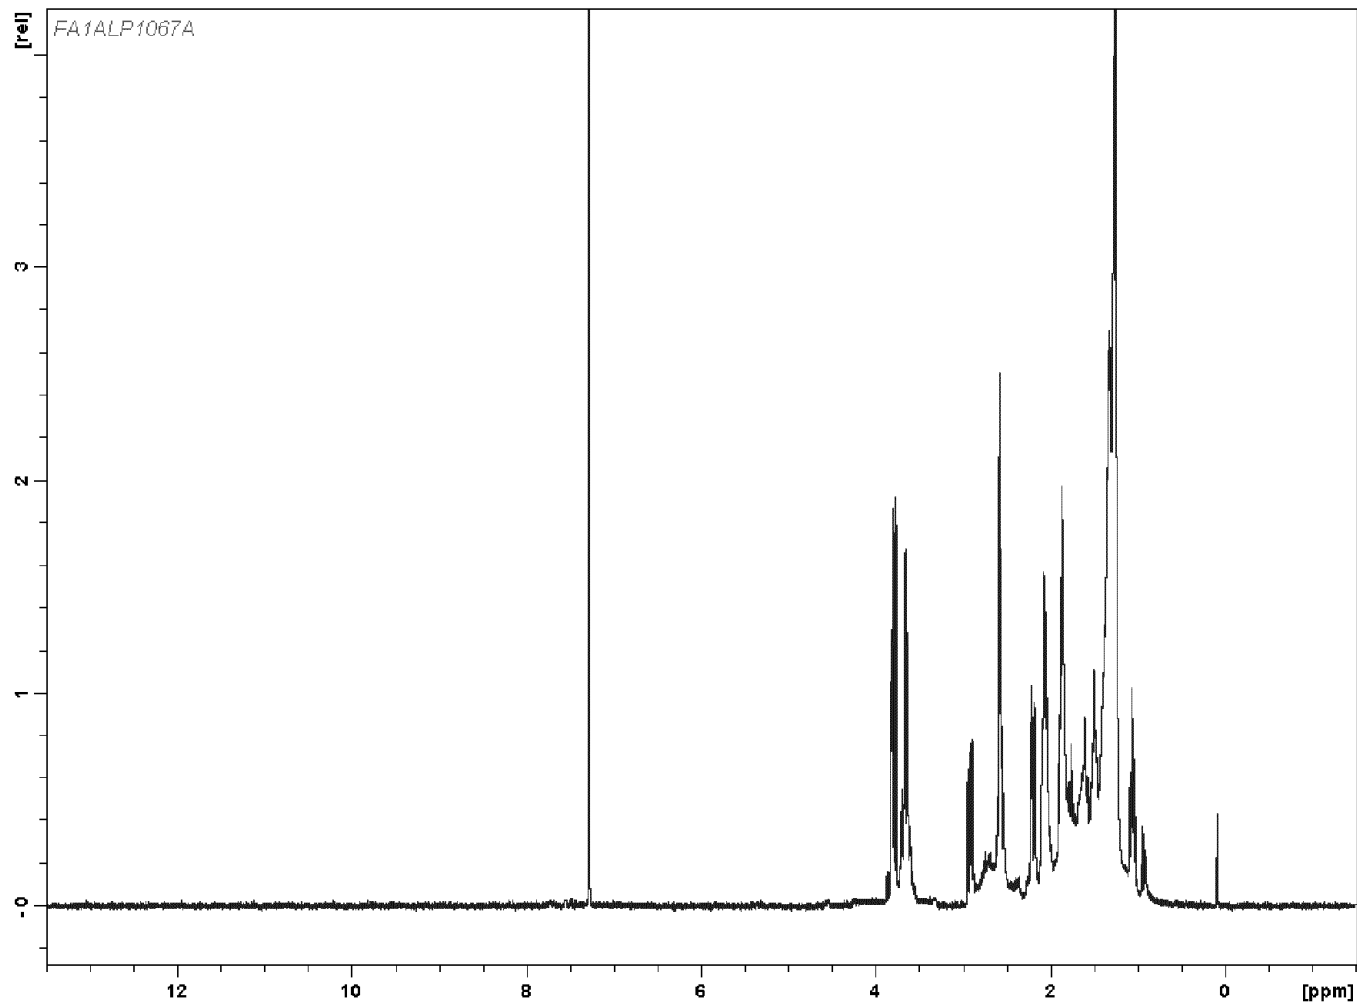

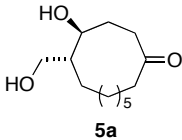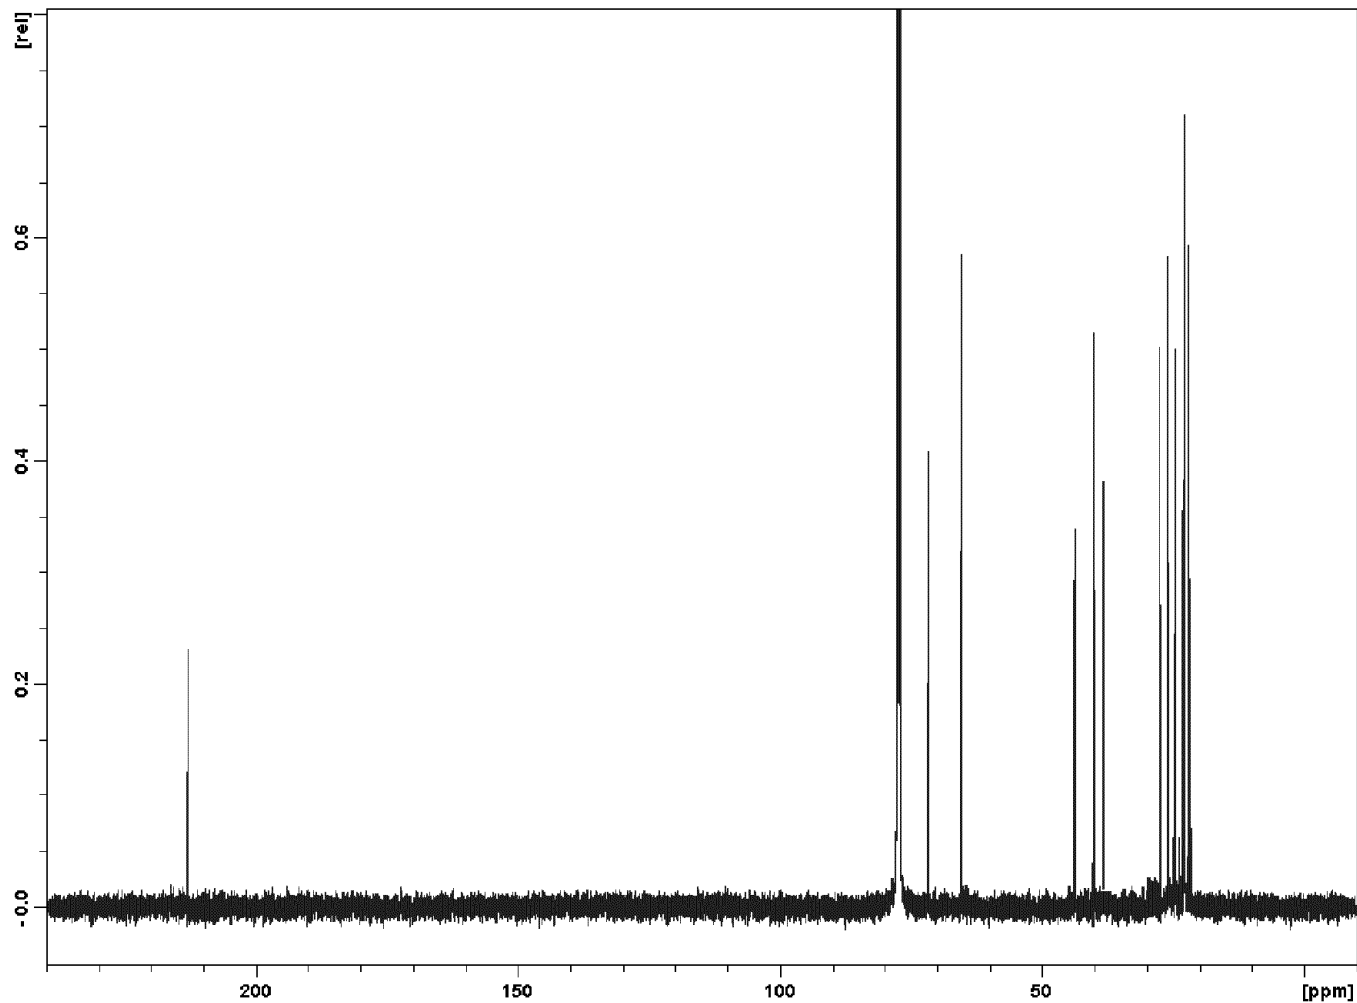

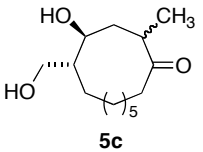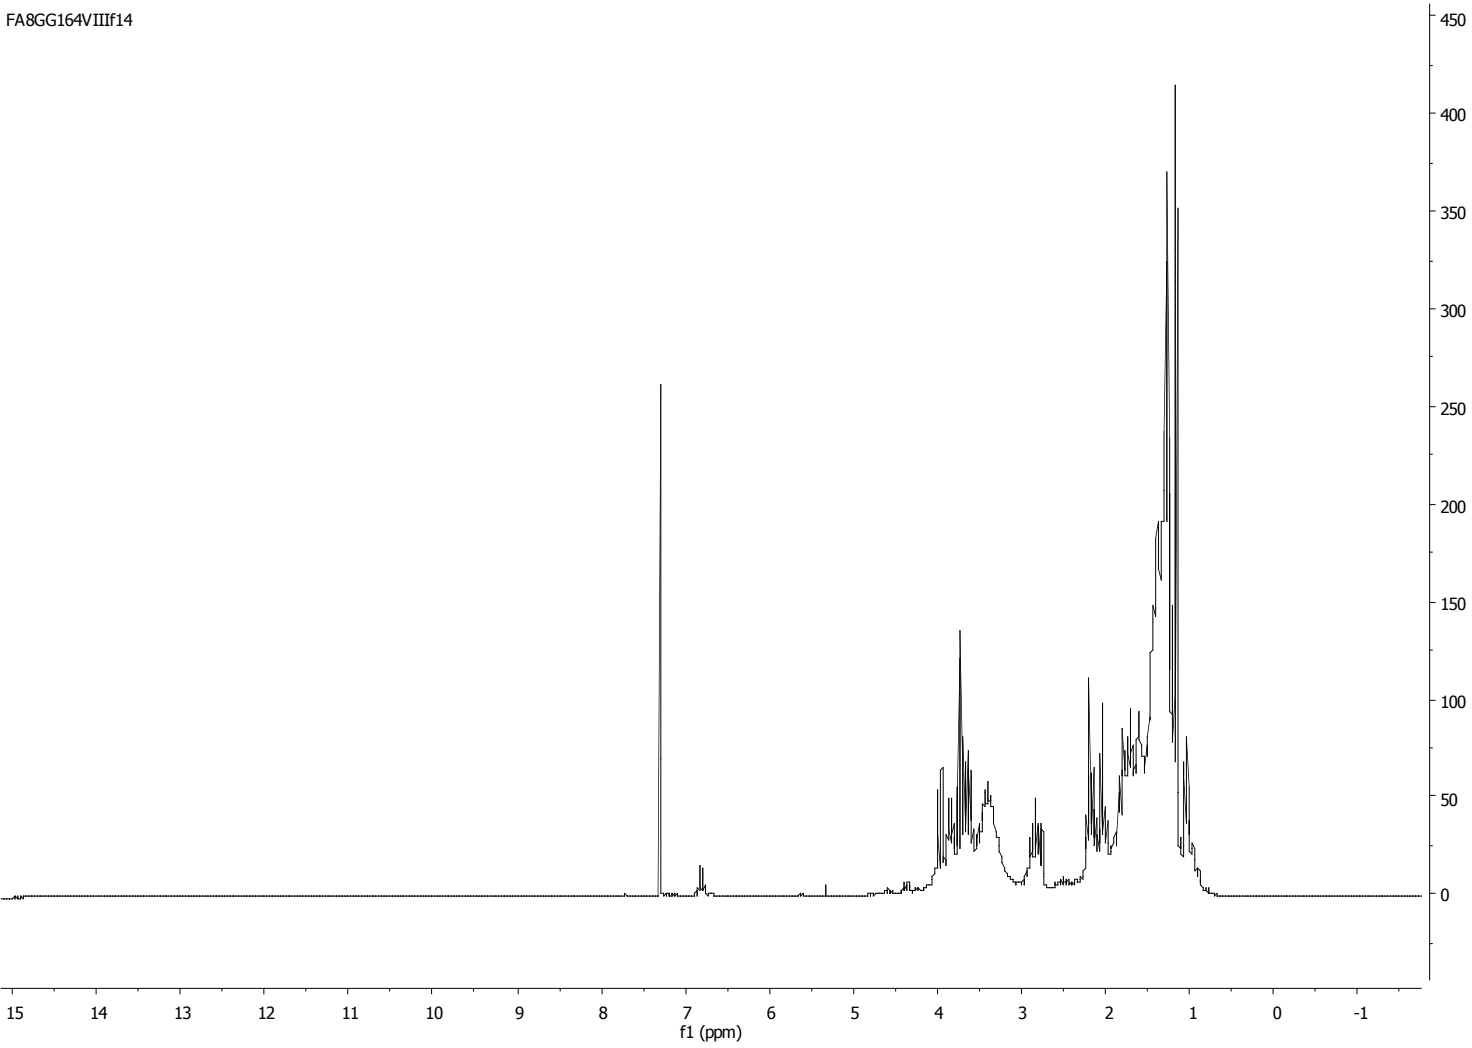





Oct20-2011-iny  
FA8GG164VIIIIF14

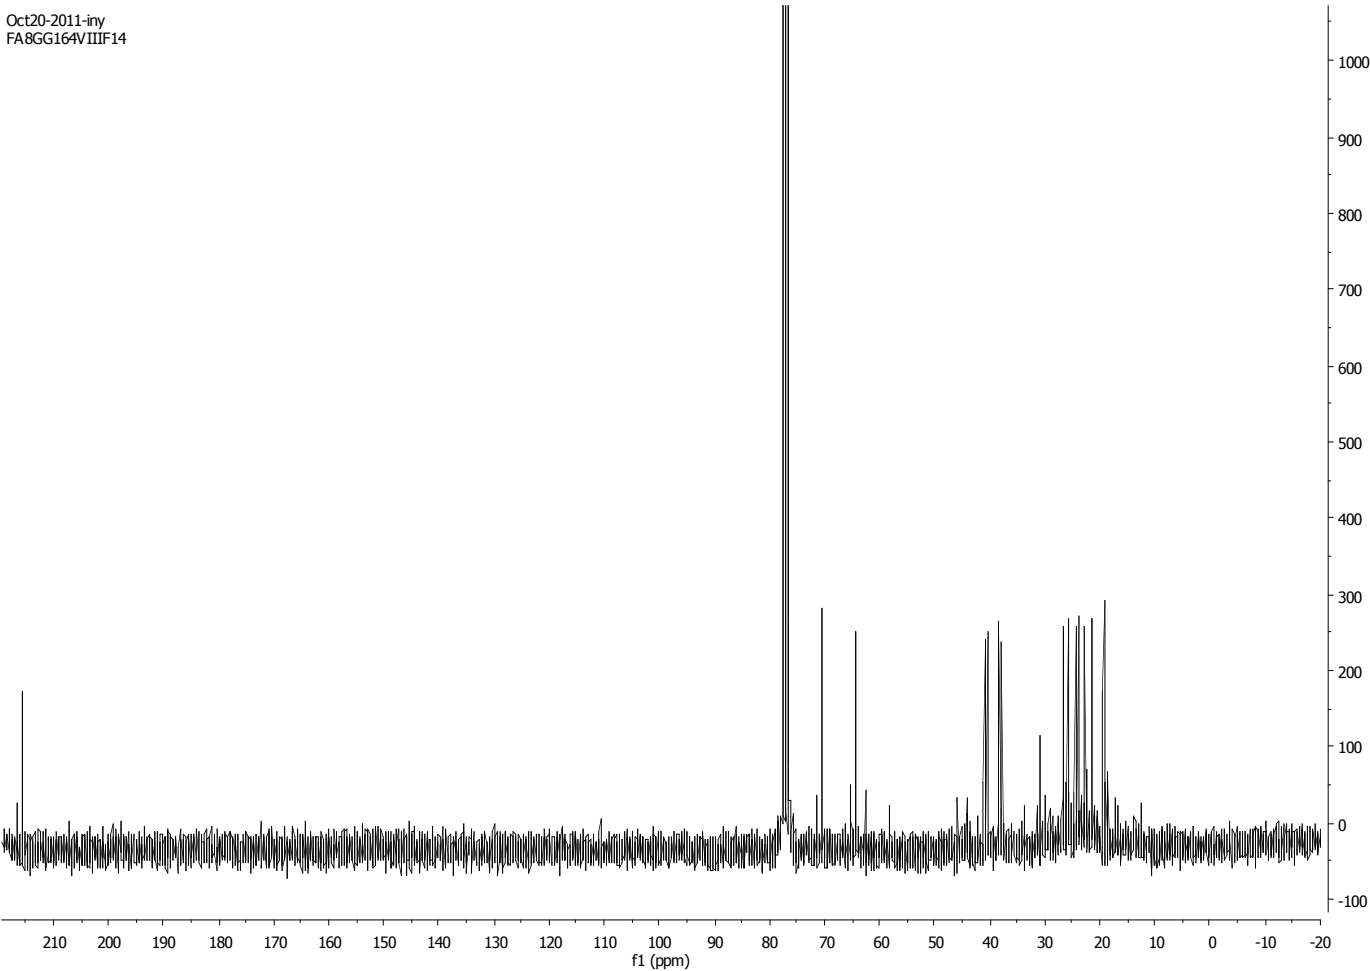

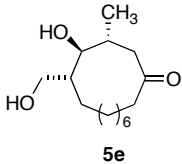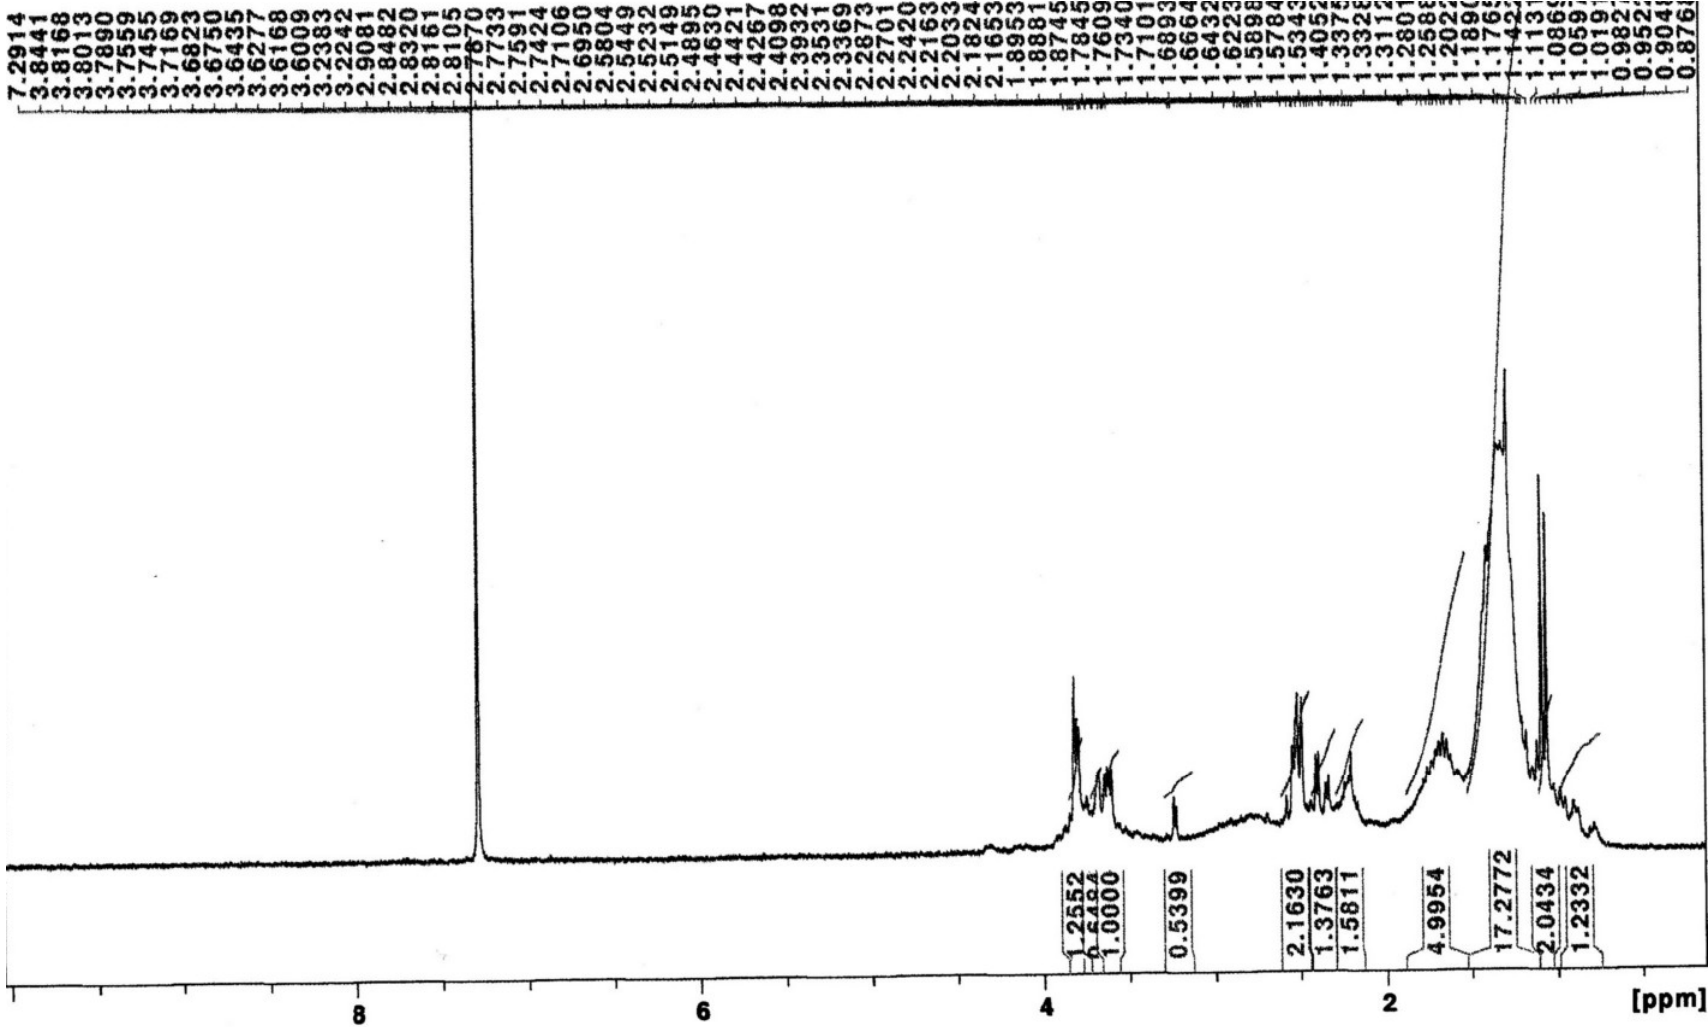

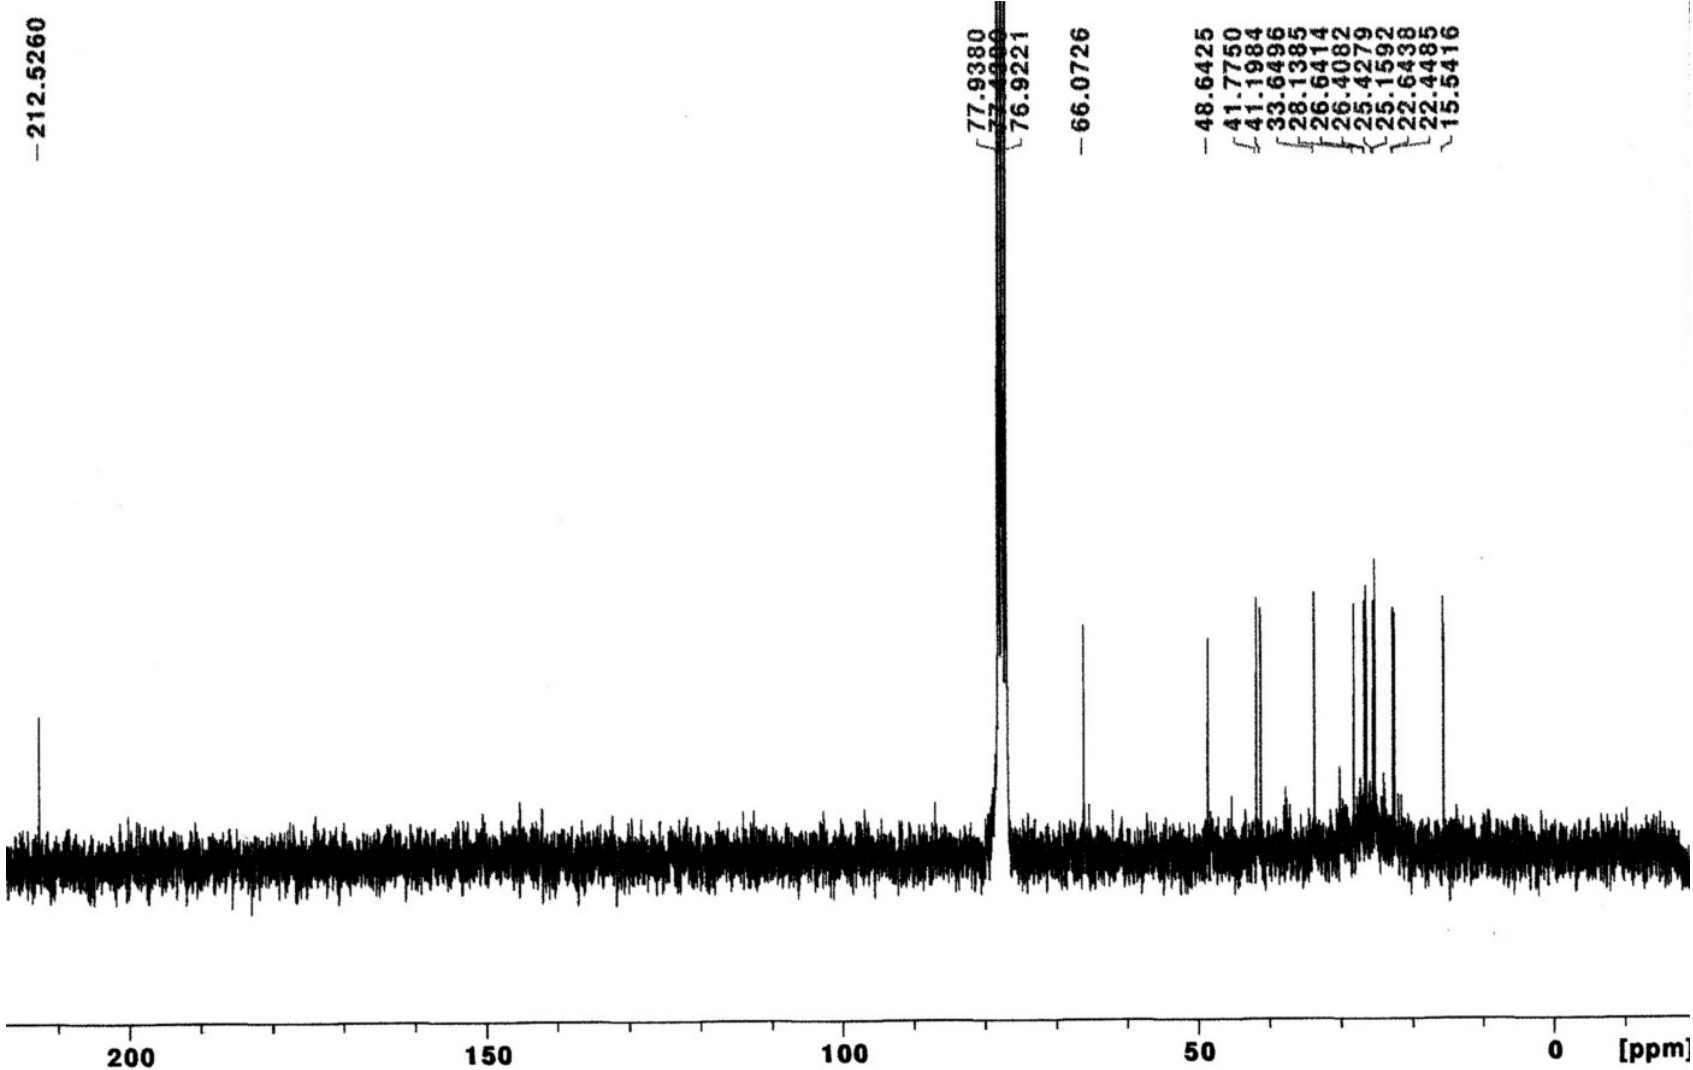

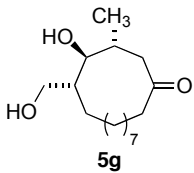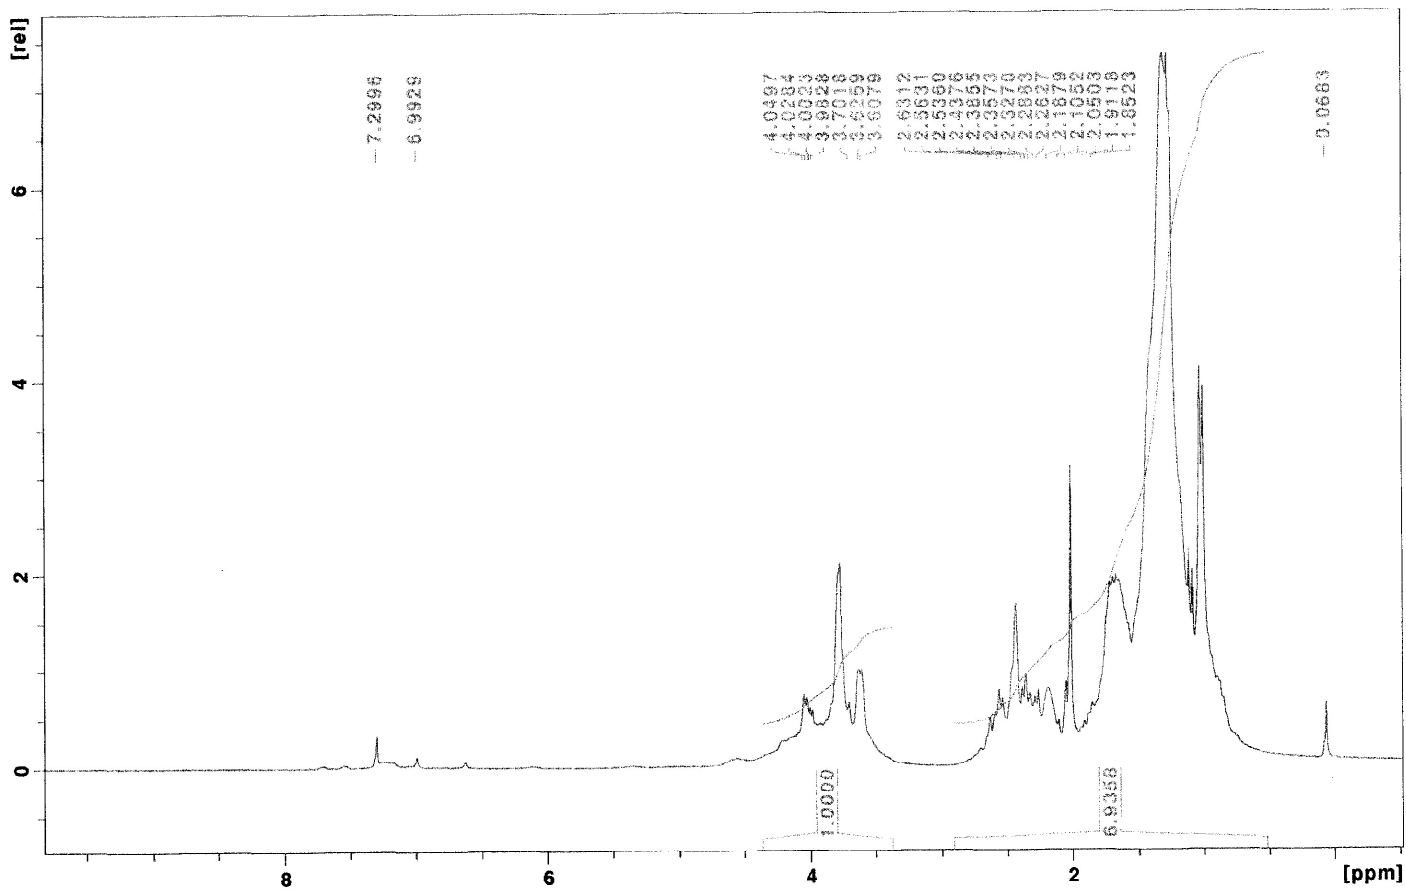

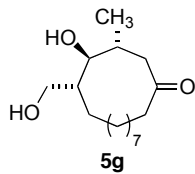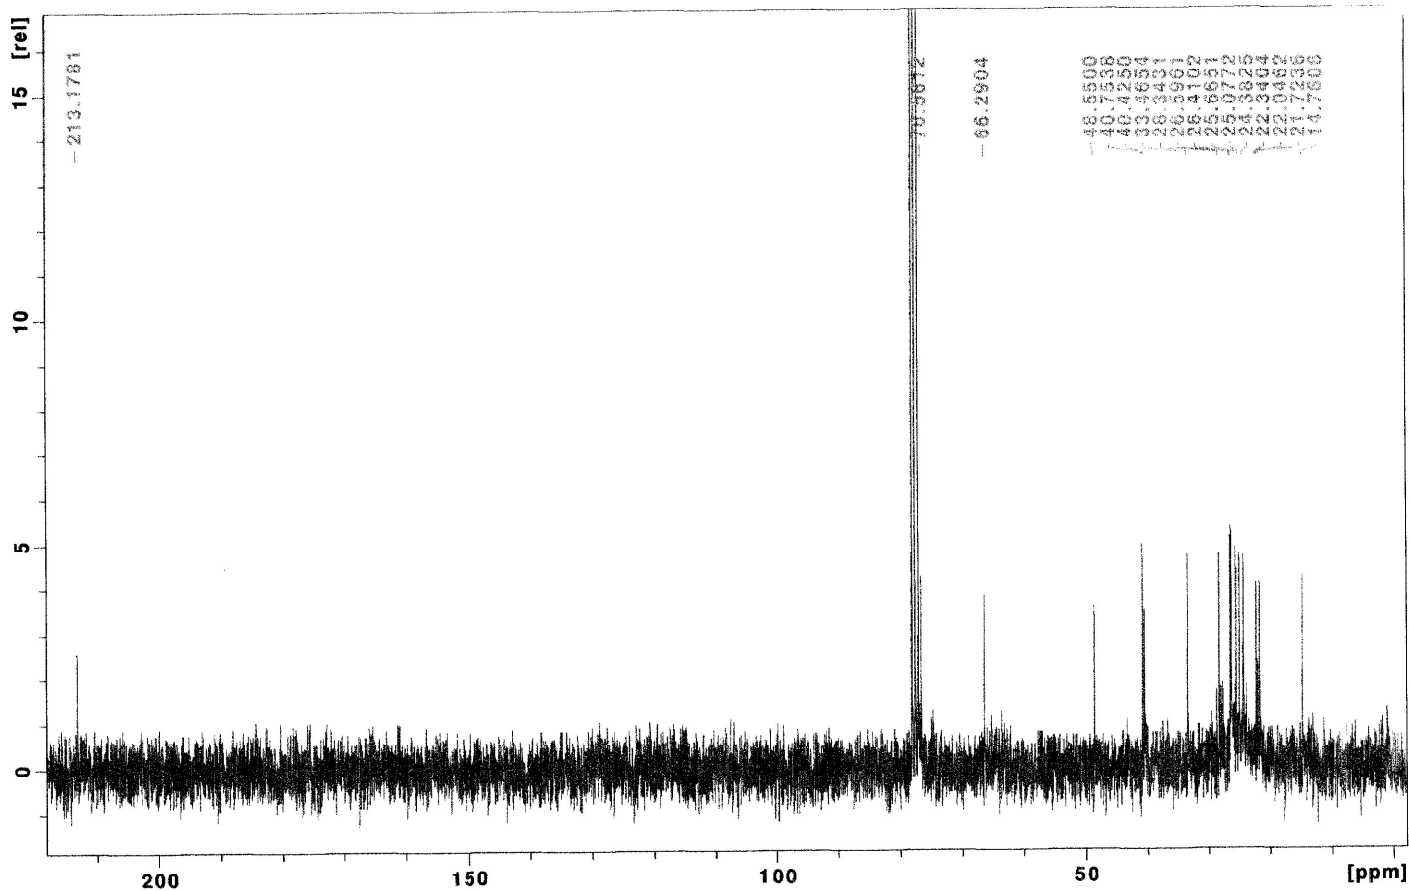

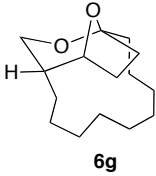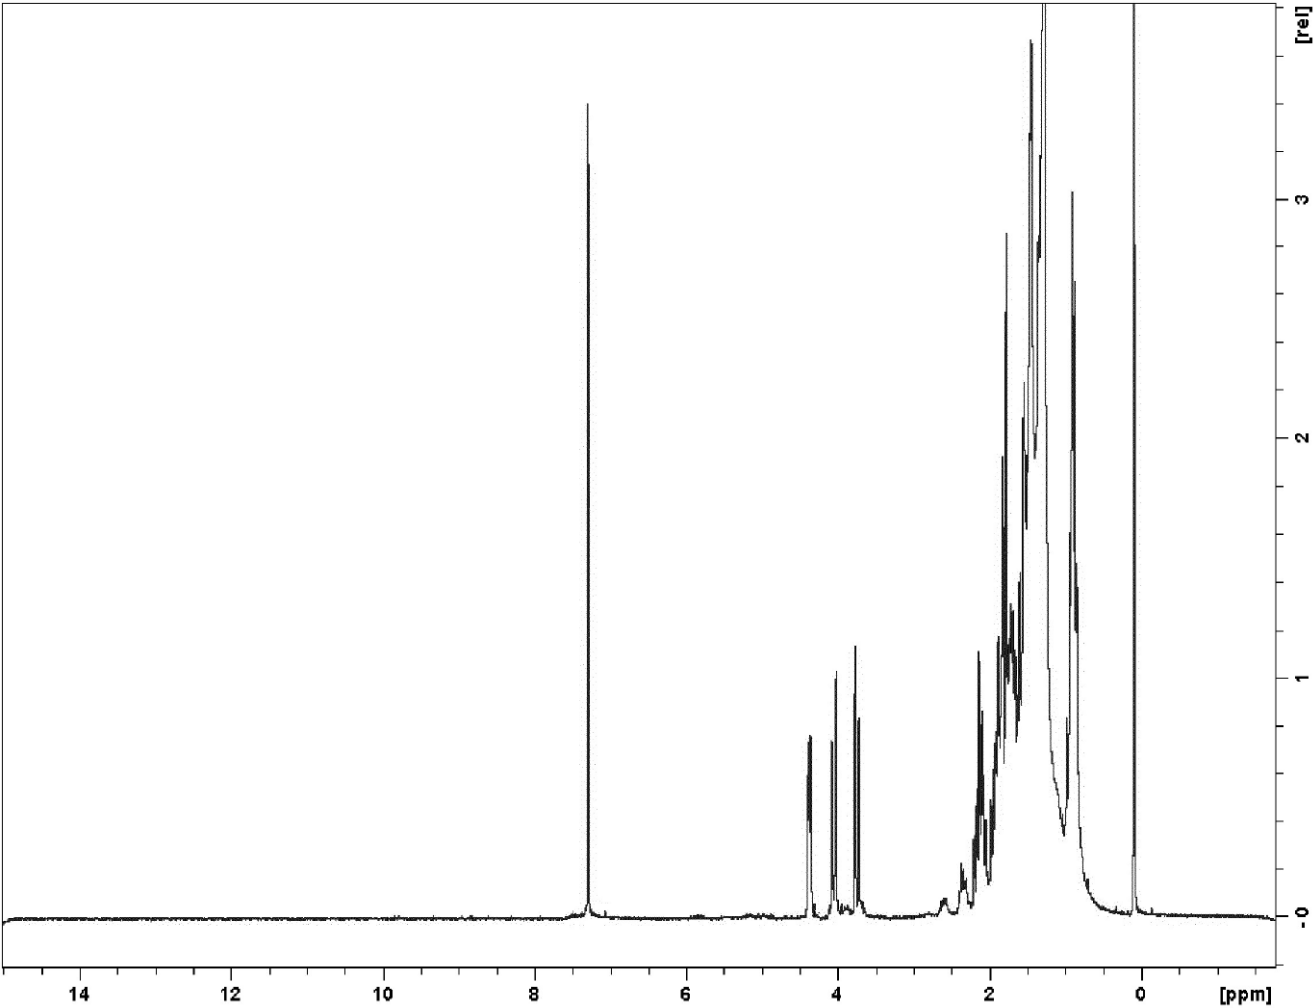

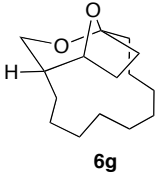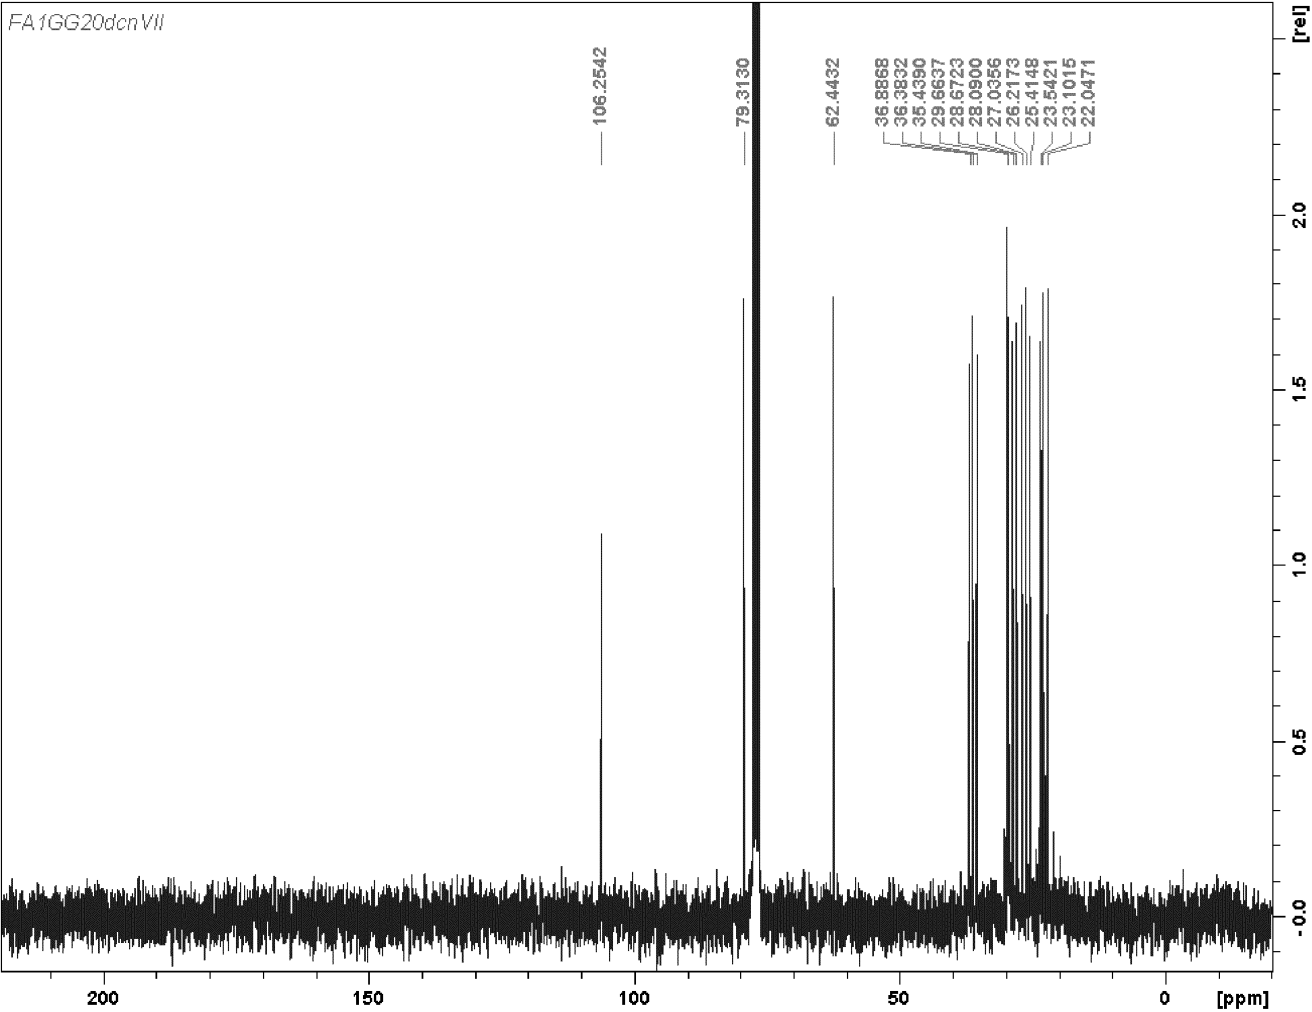

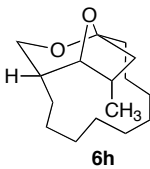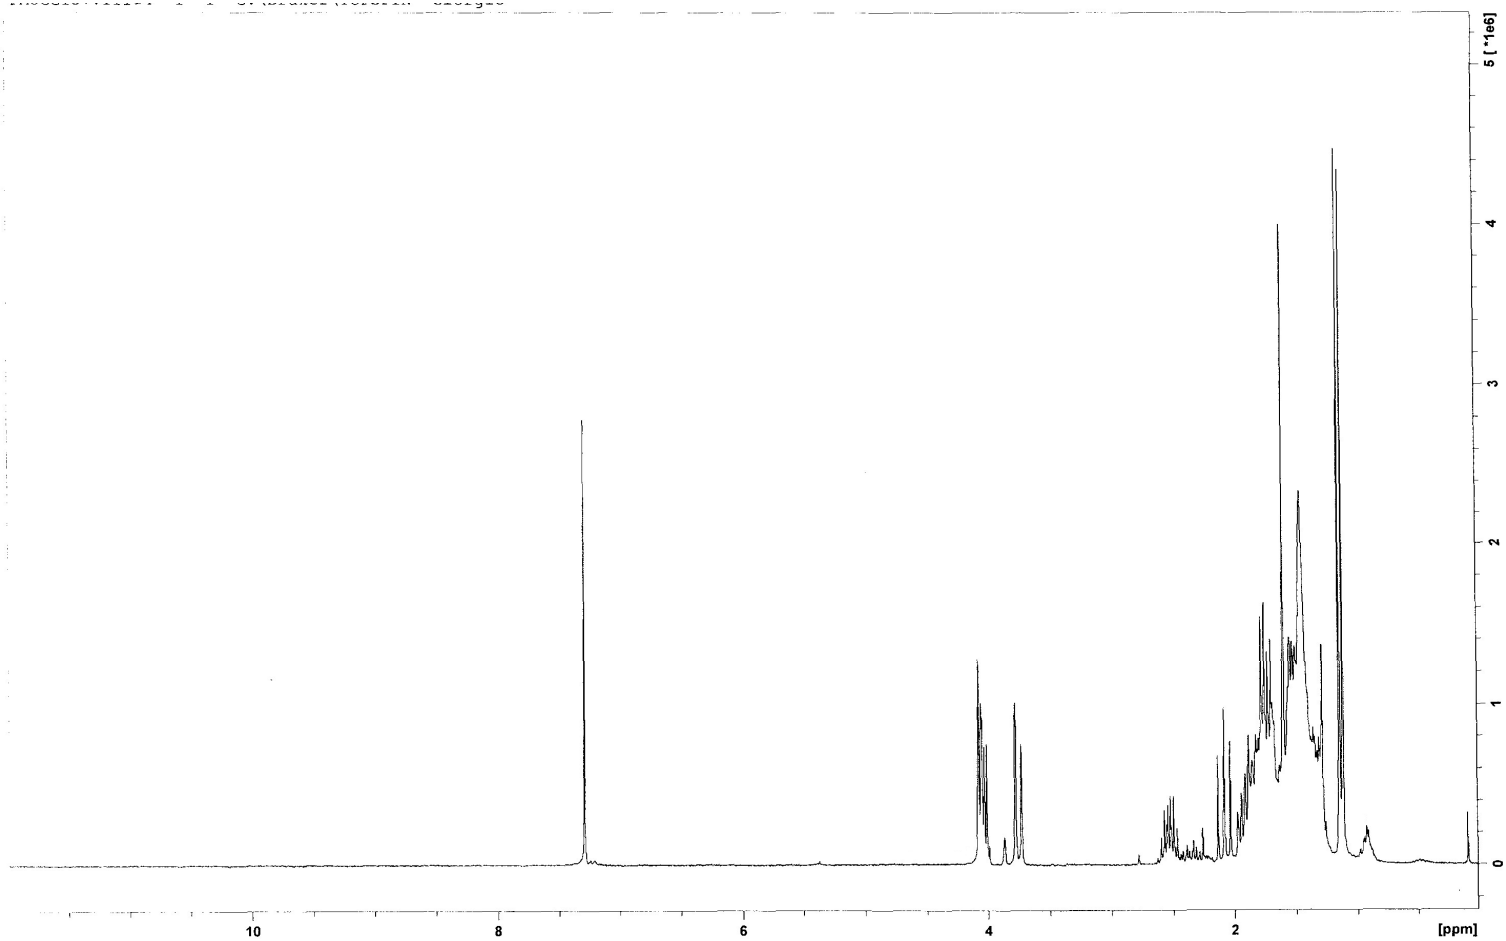



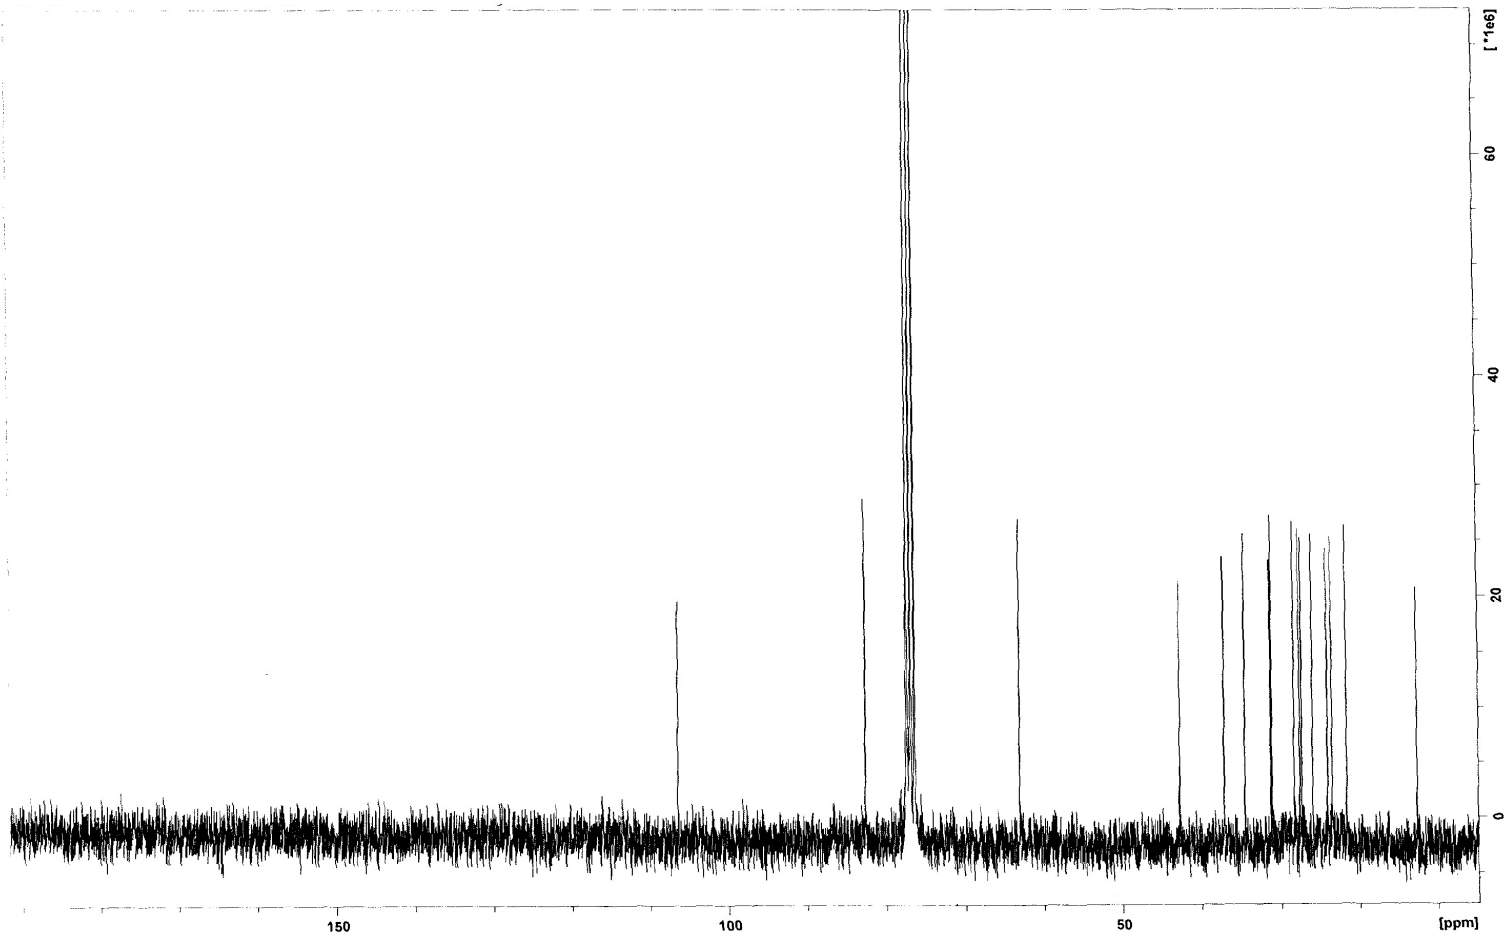

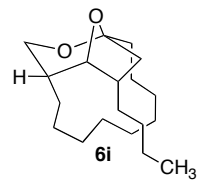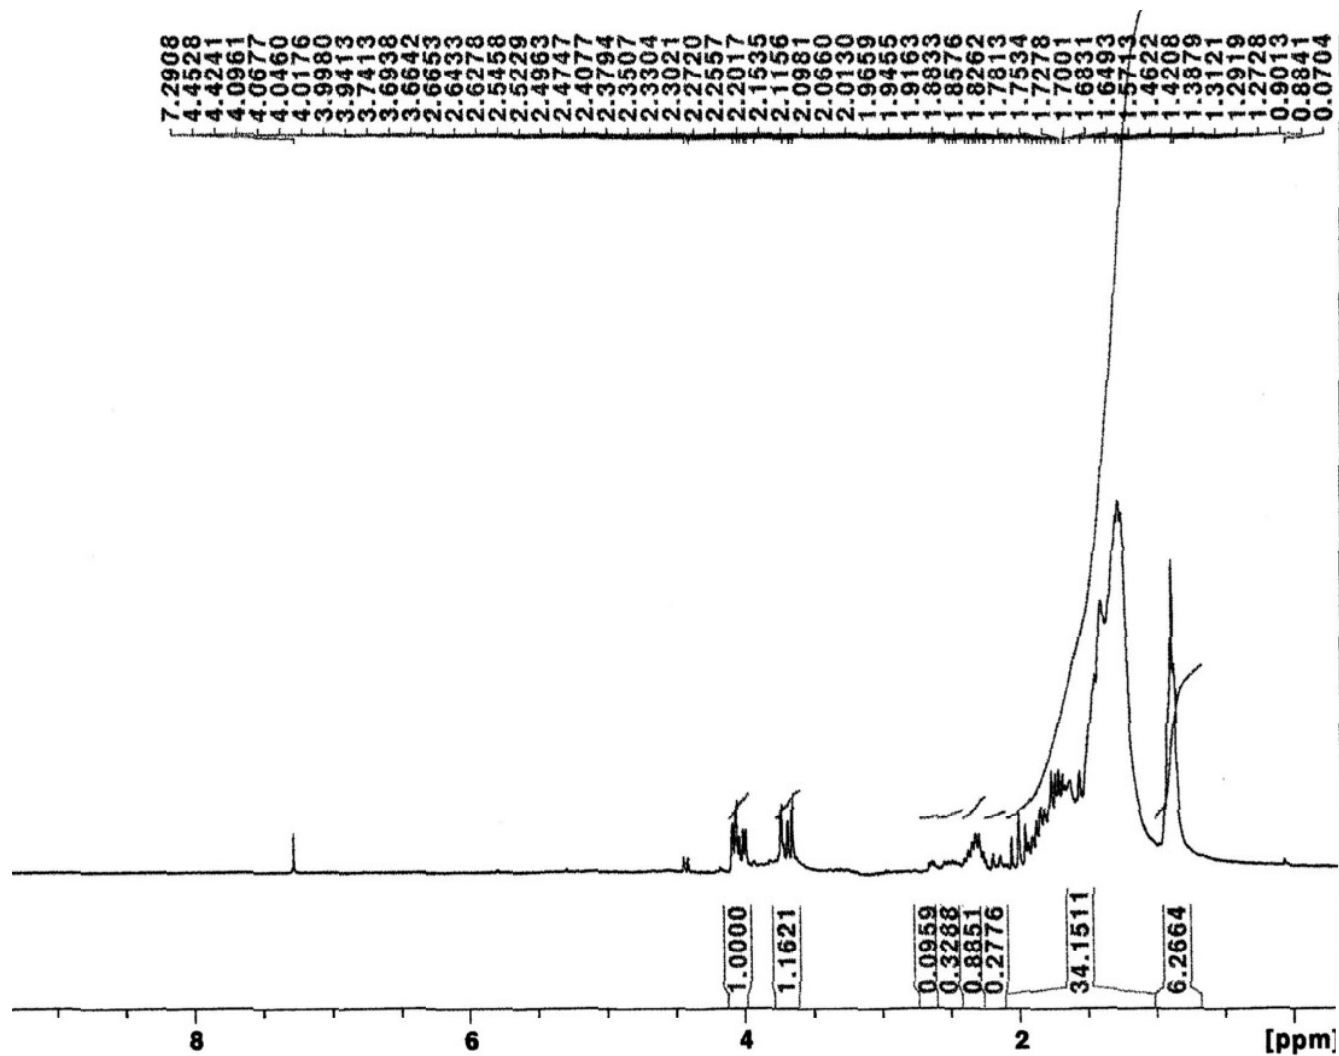

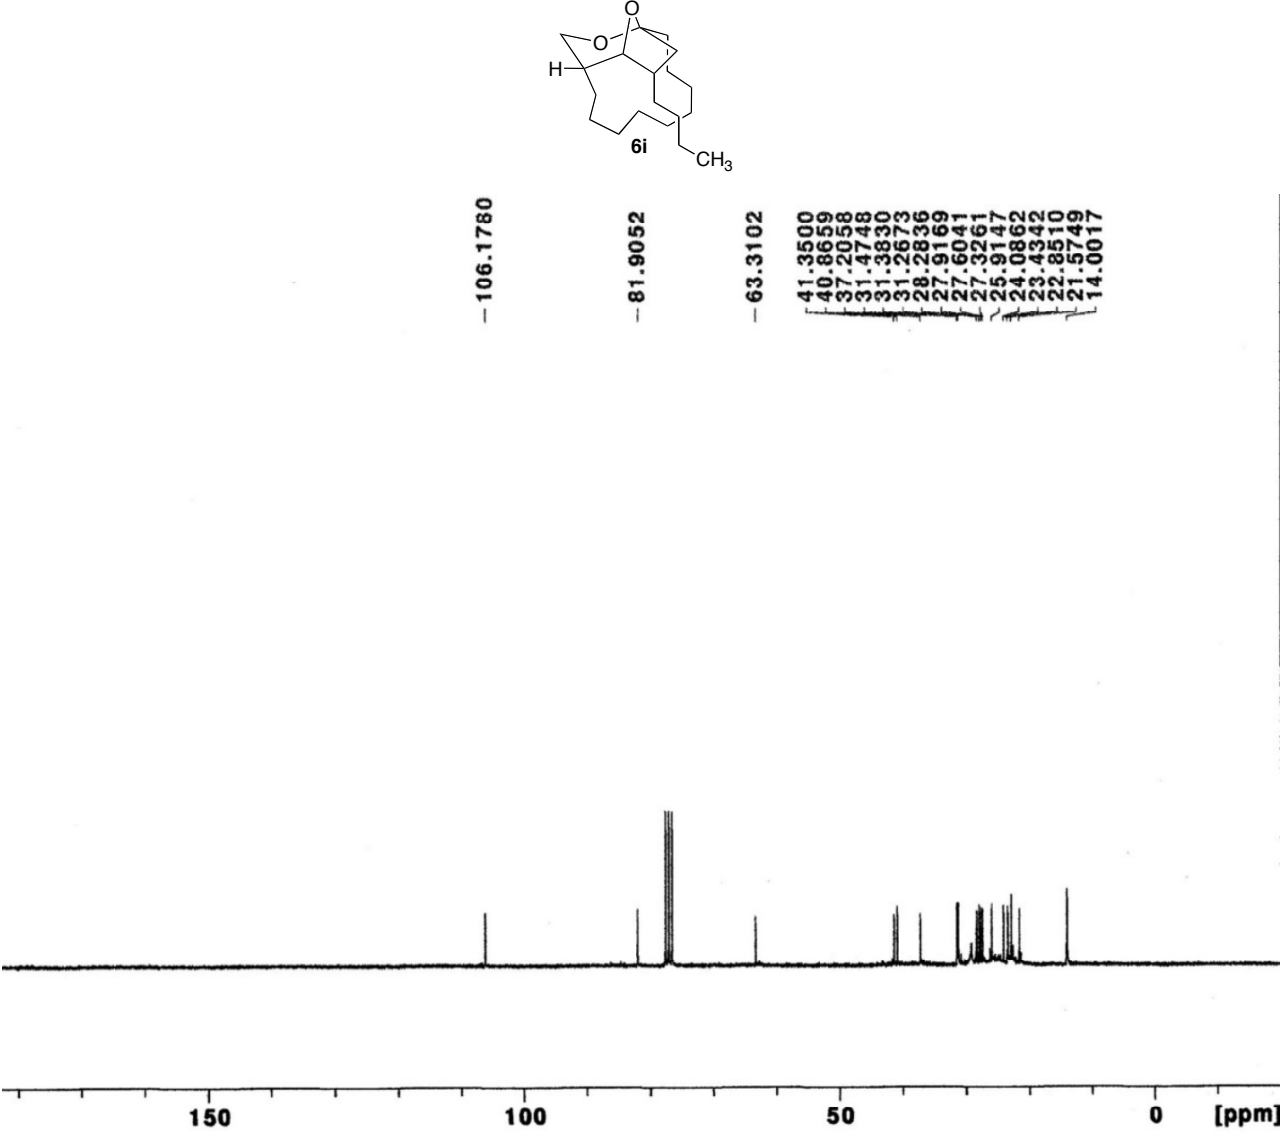

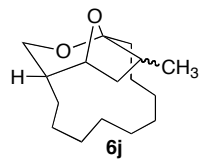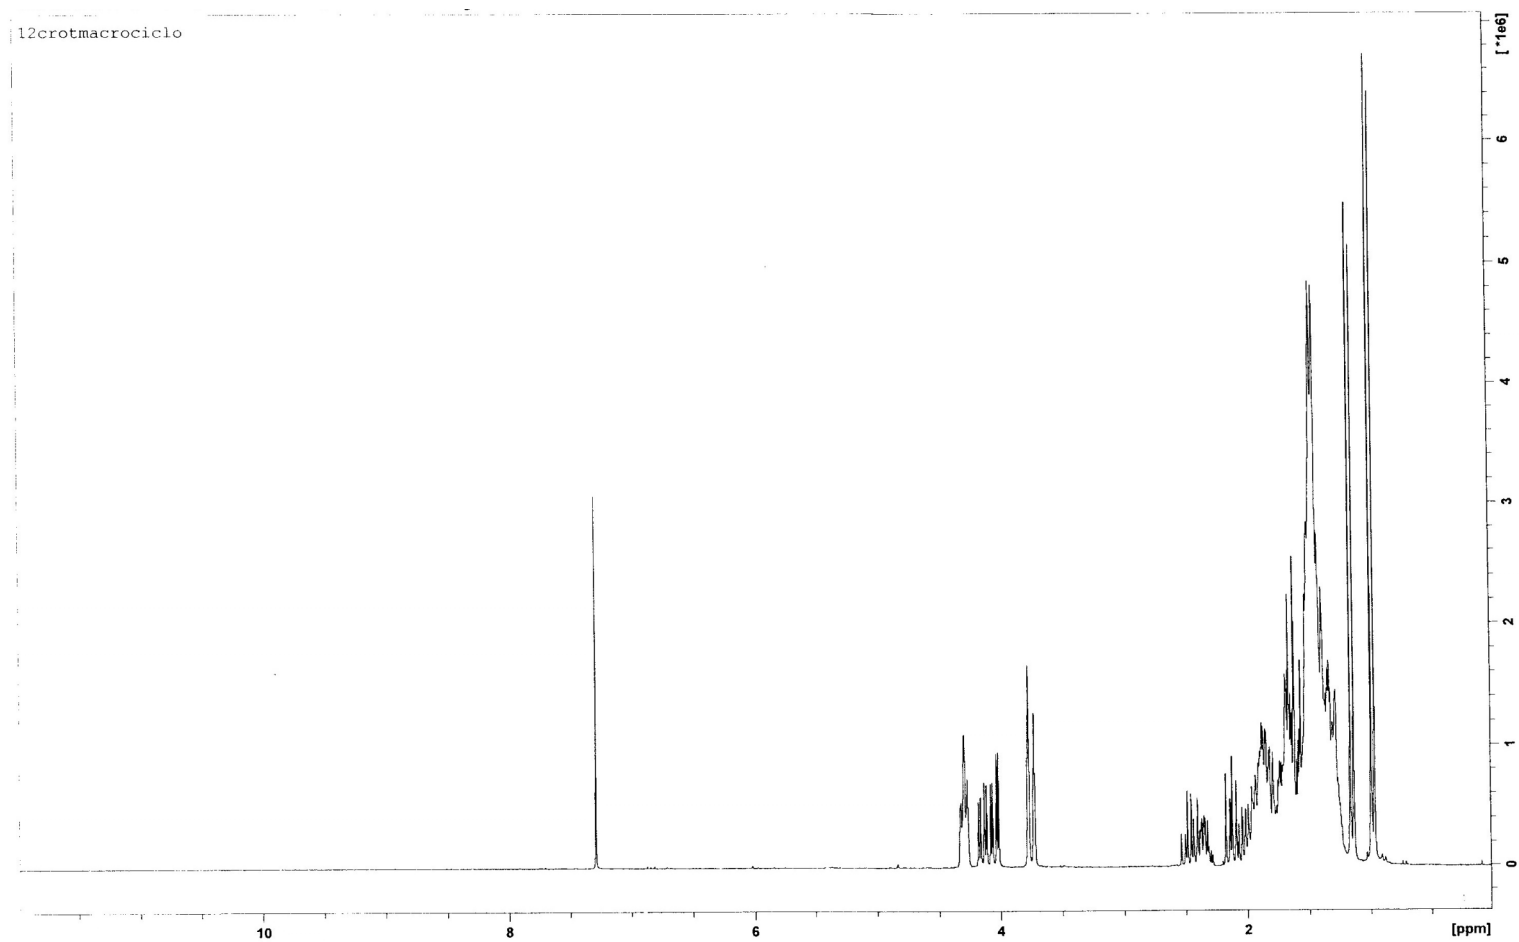

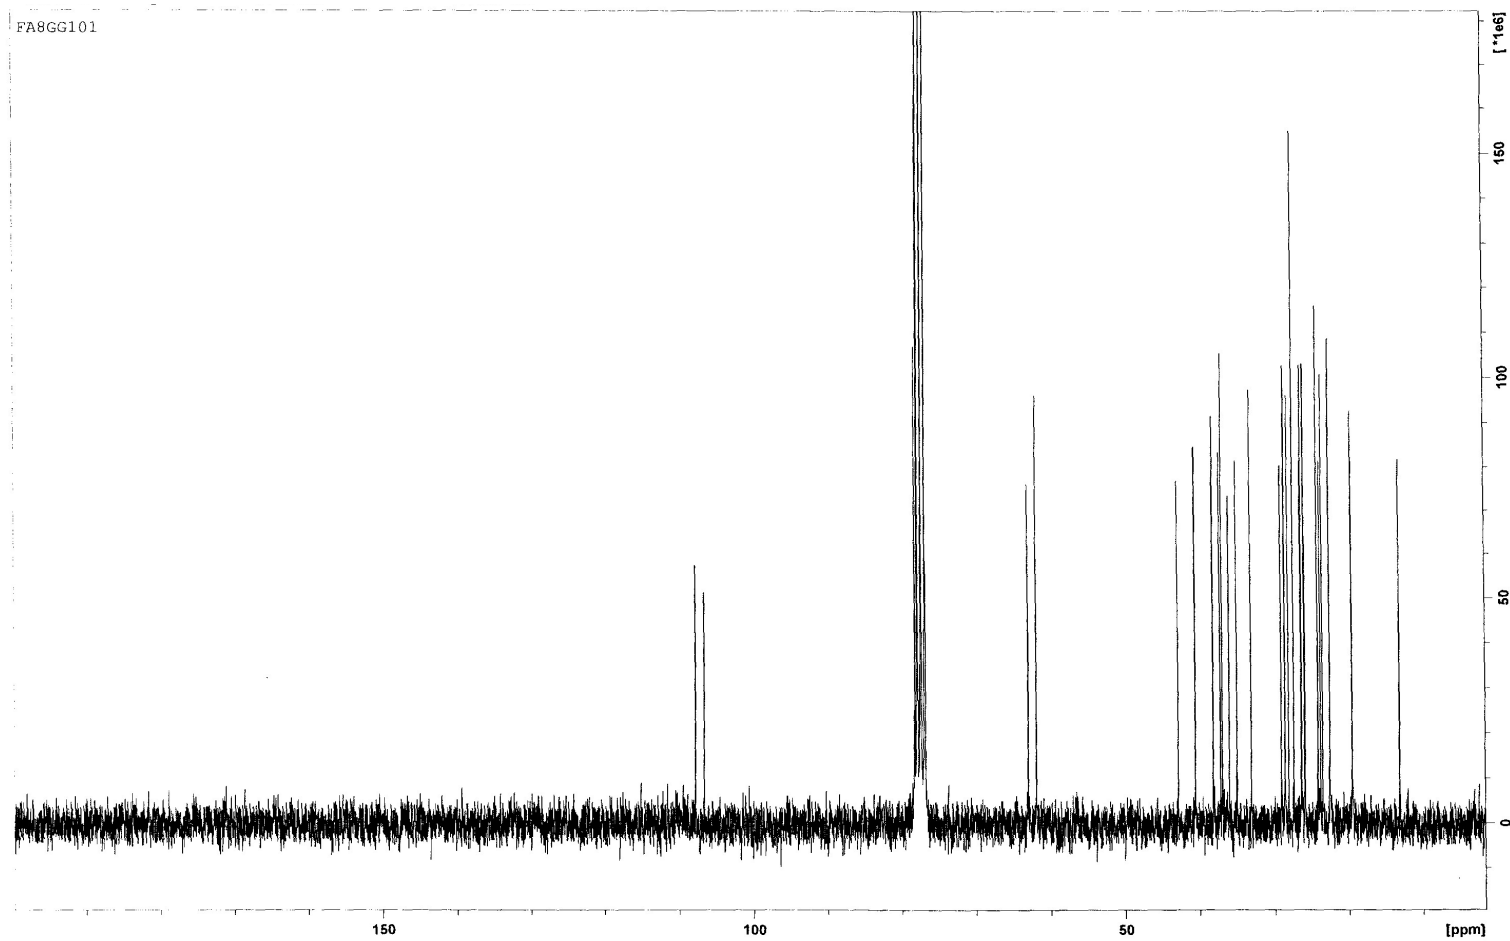

Supplement: c2ob25274k.pdf [file c2ob25274k.pdf]
